# Supplementary material for: Cadherin preserves cohesion across involuting tissues during C. elegans neurulation
Source: eLife. 2020 Oct 8;9:e58626. doi: 10.7554/eLife.58626 (PMC7544503; doi:10.7554/eLife.58626)
Supplement: Figure 2—source data 1. — WT embryos are listed above and hmr-1(zu248) below, with neuroectoderm involution (distance between opposite side neurons) listed on the left and pharynx retraction (distance of pharynx from anterior edge of embryo) on the right. Pixels are translated into microns at a ration of 3:1. [file elife-58626-fig2-data1.xlsx]

## Sheet: Sheet1
Measurement of Neuroectoderm Involution and Pharynx Retraction in WT embryos
Distance Between L/R Neurons			Pharynx anterior tip distance from anterior of embryo
embryo	pixels	microns	embryo	pixels	microns
1	0	0	1	55	18.3333
2	0	0	2	54	18
3	0	0	3	50	16.6667
4	0	0	4	56	18.6667
5	0	0	5	52	17.3333
6	0	0	6	52	17.3333
7	0	0
8	0	0
9	0	0
10	0	0
11	0	0
12	0	0
Measurement of Neuroectoderm Involution and Pharynx Retraction in hmr-1(zu248) embryos
Distance Between L/R Neurons			Pharynx anterior tip distance from anterior of embryo
embryo	pixels	microns	embryo	pixels	microns
1	75	25	1	50	16.6667
2	85	28.3333	2	52	17.3333
3	75	25	3	52	17.3333
4	95	31.6667	4	52	17.3333
5	80	26.6667	5	55	18.3333
6	75	25	6	52	17.3333
7	10	3.33333	7	Not Visible
8	0	0	8	Not Visible
9	85	28.3333	9	52	17.3333
10	84	28	10	Not Visible
11	0	0	11	47	15.6667
12	100	33.3333	12	Not Visible
