# Supplementary material for: Cadherin preserves cohesion across involuting tissues during C. elegans neurulation
Source: eLife. 2020 Oct 8;9:e58626. doi: 10.7554/eLife.58626 (PMC7544503; doi:10.7554/eLife.58626)
Supplement: Figure 2—source data 2. — Start and end distances between left/right neuronal pairs. Top table is start/end distances, and second table is made by subtracting start/end distances to get total distance traveled toward each other and averaging between n = 3 embryos. Pixel to micron ratio is 3:1. t-test is as described in Statistical methods section. [file elife-58626-fig2-data2.xlsx]

## Sheet: Sheet1
Start and End Distances of L/R Cells From Each Other, Raw (pixels)
WT	e1		e2		e3		hmr-1(zu248)	e1		e2		e3
Cell	start	end	start	end	start	end	Cell	start	end	start	end	start	end
SIBV	91.1914	49.0234	101.561	53.5477	109.917	52.9498	SIBV	127.698	109.335	148.592	109.723	121.811	101.419
SIAD	91.1914	38.2331	97.6553	28.5775	108.282	48.5234	SIAD	121.096	92.7326	151.711	80.3903	119.372	111.866
AIY	61.5604	34.3702	70.671	35.5609	78.0404	33.7563	AIY	100.736	74.8066	136.064	141.775	73.3432	58.7428
CEPV mother	134.445	64.1859	138.376	58.4715	143.947	71.9694	CEPV mother	168.363	127.303	168.701	173.245	134.658	101.617
Distance of L/R Cells Travelled Towards Each Other, averaged between n=3 embryos
WT	e1	e2	e3	Mean	Standard ErrorE	hmr-1(zu248)	e1	e2	e3	Mean	Standard Error
SIBV	14.056	16.0045	18.9892	16.3499	1.17129	SIBV	6.12094	12.9564	6.79737	8.62491	1.77551
SIAD	17.6528	23.026	19.9195	20.1994	1.27162	SIAD	9.45436	23.7736	2.50189	11.9099	5.11303
AIY	9.0634	11.7034	14.7614	11.8427	1.34423	AIY	8.64302	-1.90375	4.86683	3.8687	2.51907
CEPV mother	23.4198	26.6348	23.9925	24.6824	0.808431	CEPV mother	13.6867	-1.51466	11.0137	7.72859	3.82577
ttest
Cell	P value
SIBV	0.0206674
SIAD	0.134138
AIY	0.0423819
CEPV mother	0.0120056
