# Supplementary material for: Cadherin preserves cohesion across involuting tissues during C. elegans neurulation
Source: eLife. 2020 Oct 8;9:e58626. doi: 10.7554/eLife.58626 (PMC7544503; doi:10.7554/eLife.58626)
Supplement: Figure 3—source data 1. — HMR-1::GFP fluorescence intensity values listed before, during and after involution from anterior viewpoints of 5 WT embryos. Pharynx retraction degree was used to determine retraction degree. Basal, apical, and cytoplasm locations are indicated in Figure 3c, and background is calculated from outside of the embryo. [file elife-58626-fig3-data1.xlsx]

## Sheet: Interface (3c)
	Basal Interface			Apical			cytoplasm			Background
emb	before	during	after	before	during	after	before	during	after
1	178	203	186	176	314	430	149	154	168	110
2	179	248	184	172	243	373	152	162	172	122
3	166	191	177	170	221	437	147	171	172	129
4	108	175	141	74	157	157	61	101	118	44
5	147	182	155	158	186	223	138	140	151	119
	minus background
	Basal Interface			Apical			cytoplasm
emb	before	during	after	before	during	after	before	during	after
1	68	93	76	66	204	320	39	44	58
2	57	126	62	50	121	251	30	40	50
3	37	62	48	41	92	308	18	42	43
4	64	175	141	74	157	157	61	101	118
5	28	182	155	158	186	223	138	140	151
