# Supplementary material for: Cadherin preserves cohesion across involuting tissues during C. elegans neurulation
Source: eLife. 2020 Oct 8;9:e58626. doi: 10.7554/eLife.58626 (PMC7544503; doi:10.7554/eLife.58626)
Supplement: Figure 3—source data 2. — Distance between pharyngeal nuclei and interface neuron before and after pharynx retraction, in WT and hmr-1(zu248) mutants. [file elife-58626-fig3-data2.xlsx]

## Sheet: Sheet1
	Neurons	Pharynx
WT	39.2246	41.1605
hmr-1(zu248)	24.6971	33.411
stdev	9.0041	10.8385	7.785	11.0548
stderror	5.19852	6.25761	4.49467	6.38249
