# Supplementary material for: Cadherin preserves cohesion across involuting tissues during C. elegans neurulation
Source: eLife. 2020 Oct 8;9:e58626. doi: 10.7554/eLife.58626 (PMC7544503; doi:10.7554/eLife.58626)
Supplement: Figure 4—source data 1. — HMR-1::GFP fluorescence is measured at cell edges among involuting neurons and non-involuting neurons (amphid), and also in the cytoplasm of involuting neurons. All measurements are mid-involution, and normalization to the background is done by using background values from outside the embryo. [file elife-58626-fig4-data1.xlsx]

## Sheet: Intratissue (4c)
Emb	neurons (mid involution)	amphid (mid involution)	cytoplasm (mid involution)	background fluorescence	neurons normalized to background	amphid normalized to background	cytoplasm normalized to background
s8 t42	10787	7085	7822	2383	4.52665	2.97314	3.28242
	12716	7166	8073		5.33613	3.00713	3.38775
	12097	7500	7695		5.07637	3.14729	3.22912
	9223	7193	8501		3.87033	3.01846	3.56735
	15776	7200	6640		6.62023	3.0214	2.7864
s2e1 t20	6969.59	4609.59	4562.69	1766	3.94654	2.61019	2.58363
	7166.52	5451.08	4506.54		4.05805	3.08668	2.55184
	6281.94	4937.16	4590		3.55716	2.79567	2.59909
	8041.75	5190.64	3977.86		4.55365	2.93921	2.25247
	5395.39	4912.61	5068.79		3.05515	2.78177	2.87021
s2e2 t80	5436.24	4543.78	4852.37	1712	3.17537	2.65408	2.83433
	5048.19	5061.35	4713.62		2.94871	2.9564	2.75328
	5443.63	4618.41	4761.86		3.17969	2.69767	2.78146
	4250.82	4357.41	5114.69		2.48296	2.54522	2.98755
	5662.62	4278.02	5081.36		3.3076	2.49884	2.96808
s4e2 t2	6247.35	6451.72	5550.95	1675	3.72976	3.85177	3.314
	8004.52	7151.21	5179.79		4.77882	4.26938	3.09241
	5470.92	6675.05	5497.12		3.26622	3.98511	3.28187
	7734.24	7366.21	5053.09		4.61746	4.39774	3.01677
	6490.49	7386.44	5857.05		3.87492	4.40981	3.49675
s5e1 t80	8069.73	5606.73	5077.69	1828	4.41451	3.06714	2.77773
	8721.45	4505.74	5992.88		4.77104	2.46485	3.27838
	8467.45	5039.39	4640.29		4.63209	2.75678	2.53845
	5323.18	5026.14	5277.27		2.91203	2.74953	2.88691
	7635.38	3738.87	4522.3		4.1769	2.04533	2.4739
s5e2 t80	5902.31	5873.03	4845.19	1828	3.22883	3.21282	2.65054
	6474.25	5701.72	5209.59		3.54171	3.1191	2.84989
	5883.34	3931.82	5241.22		3.21846	2.15089	2.86719
	6846.5	5781.89	4337.2		3.74535	3.16296	2.37265
	6202.58	4349.69	4797.44		3.39309	2.37948	2.62442
Average	7458.98	5622.99	5434.66		3.93319	3.02519	2.89856
