# Supplementary material for: Cadherin preserves cohesion across involuting tissues during C. elegans neurulation
Source: eLife. 2020 Oct 8;9:e58626. doi: 10.7554/eLife.58626 (PMC7544503; doi:10.7554/eLife.58626)
Supplement: Figure 4—source data 2. — Motion path correlation path values are given for neurons in n = 3 embryos, and the average for each pairwise correlation is displayed in the heatmap shown in Figure 4e. [file elife-58626-fig4-data2.xlsx]

## Sheet: Sheet1
WT correlation of motion
e1											e2											e3
1	0.199287	0.340551	0.173161	0.276808	-0.0160592	-0.245427	-0.246018	-0.230253	-0.229482		1	0.158194	0.335095	-0.0057398	0.202354	-0.175272	-0.218557	-0.37016	-0.298547	-0.300068		1	0.464622	0.478696	0.528905	0.118949	0.0559129	-0.297618	-0.288154	-0.203757	-0.45796
0.199287	1	0.731748	0.38759	0.888067	-0.398839	0.189003	0.000878055	-0.266649	0.137752		0.158194	1	0.707012	0.216185	0.811246	-0.445332	0.094771	-0.226803	-0.624204	0.080904		0.464622	1	0.68535	0.525075	0.525335	-0.104527	0.021273	-0.290841	-0.237931	0.118903
0.340551	0.731748	1	0.284343	0.828981	-0.349927	0.0542802	-0.130355	-0.293648	0.0169935		0.335095	0.707012	1	0.2612	0.645368	-0.514119	-0.222394	-0.507323	-0.621992	-0.276806		0.478696	0.68535	1	0.372015	0.411763	-0.118009	-0.0215671	-0.187364	-0.229237	-0.0842442
0.173161	0.38759	0.284343	1	0.380919	-0.0179734	0.0933176	-0.044413	0.0322784	0.0563491		-0.0057398	0.216185	0.2612	1	0.327375	-0.284369	-0.108918	-0.292747	-0.0523615	-0.20169		0.528905	0.525075	0.372015	1	0.150454	0.211098	0.0571702	-0.104446	0.00176786	-0.159663
0.276808	0.888067	0.828981	0.380919	1	-0.344612	0.304352	0.0561727	-0.256105	0.272533		0.202354	0.811246	0.645368	0.327375	1	-0.468617	0.173583	-0.240849	-0.382752	0.121085		0.118949	0.525335	0.411763	0.150454	1	-0.495791	0.169205	-0.223444	-0.116849	0.246701
-0.0160592	-0.398839	-0.349927	-0.0179734	-0.344612	1	0.225854	0.275744	-0.0750576	0.18786		-0.175272	-0.445332	-0.514119	-0.284369	-0.468617	1	0.519699	0.667256	0.357487	0.459782		0.0559129	-0.104527	-0.118009	0.211098	-0.495791	1	0.391473	0.280303	0.50079	-0.0583441
-0.245427	0.189003	0.0542802	0.0933176	0.304352	0.225854	1	0.795812	0.250982	0.907809		-0.218557	0.094771	-0.222394	-0.108918	0.173583	0.519699	1	0.868906	0.296743	0.948379		-0.297618	0.021273	-0.0215671	0.0571702	0.169205	0.391473	1	0.427582	0.409849	0.561212
-0.246018	0.000878055	-0.130355	-0.044413	0.0561727	0.275744	0.795812	1	0.259549	0.806457		-0.37016	-0.226803	-0.507323	-0.292747	-0.240849	0.667256	0.868906	1	0.484408	0.895449		-0.288154	-0.290841	-0.187364	-0.104446	-0.223444	0.280303	0.427582	1	0.351868	0.452031
-0.230253	-0.266649	-0.293648	0.0322784	-0.256105	-0.0750576	0.250982	0.259549	1	0.235927		-0.298547	-0.624204	-0.621992	-0.0523615	-0.382752	0.357487	0.296743	0.484408	1	0.317062		-0.203757	-0.237931	-0.229237	0.00176786	-0.116849	0.50079	0.409849	0.351868	1	0.297452
-0.229482	0.137752	0.0169935	0.0563491	0.272533	0.18786	0.907809	0.806457	0.235927	1		-0.300068	0.080904	-0.276806	-0.20169	0.121085	0.459782	0.948379	0.895449	0.317062	1		-0.45796	0.118903	-0.0842442	-0.159663	0.246701	-0.0583441	0.561212	0.452031	0.297452	1
mutant correlation of motion
e1											e2											e3
1	0.31546	0.695629	0.356171	0.19336	-0.124723	-0.168704	-0.165958	-0.100364	-0.573721		1	-0.17534	0.041359	0.150439	0.00392471	-0.117952	-0.044452	-0.0107873	-0.126632	0.0646827		1	0.0874474	0.074331	-0.0469527	-0.00115532	0.0632507	0.0130211	-0.0786265	0.0652883	0.0113342
0.31546	1	0.295244	0.0174233	0.0645417	-0.128038	-0.418605	0.00834982	-0.115691	0.146073		-0.17534	1	0.189	-0.0458411	-0.132588	-0.178061	-0.0160281	-0.232783	0.0190266	0.183768		0.0874474	1	0.193184	0.266681	-0.278715	0.272957	0.157565	0.23355	0.0997481	0.402756
0.695629	0.295244	1	0.238686	0.0898702	-0.124761	-0.342926	-0.0247701	-0.151711	-0.459352		0.041359	0.189	1	-0.00492444	-0.08245	-0.332546	0.00733865	-0.475058	-0.191807	-0.046071		0.074331	0.193184	1	0.093044	0.0667196	-0.0359795	0.0924993	0.0613651	0.022229	0.184985
0.356171	0.0174233	0.238686	1	-0.0596203	-0.0642883	-0.130659	0.0909096	0.244919	-0.133179		0.150439	-0.0458411	-0.00492444	1	0.0428856	0.0566689	0.0745783	0.0639227	0.0739295	0.122639		-0.0469527	0.266681	0.093044	1	-0.115262	0.0143326	0.014943	-0.0393022	0.217278	0.181074
0.19336	0.0645417	0.0898702	-0.0596203	1	-0.0949959	0.0815402	-0.037768	-0.187512	-0.228706		0.00392471	-0.132588	-0.08245	0.0428856	1	0.0607988	-0.156148	0.245357	0.0827929	0.208666		-0.00115532	-0.278715	0.0667196	-0.115262	1	-0.017324	-0.305308	0.153775	0.0476004	-0.0632142
-0.124723	-0.128038	-0.124761	-0.0642883	-0.0949959	1	0.158197	-0.0101488	0.331506	0.340925		-0.117952	-0.178061	-0.332546	0.0566689	0.0607988	1	-0.122882	0.218159	0.41821	-0.336108		0.0632507	0.272957	-0.0359795	0.0143326	-0.017324	1	0.0319453	0.0337234	-0.0368069	0.0830537
-0.168704	-0.418605	-0.342926	-0.130659	0.0815402	0.158197	1	-0.0685596	0.125033	0.0227294		-0.044452	-0.0160281	0.00733865	0.0745783	-0.156148	-0.122882	1	0.00361153	0.081939	0.144598		0.0130211	0.157565	0.0924993	0.014943	-0.305308	0.0319453	1	-0.0239739	-0.187745	0.0150973
-0.165958	0.00834982	-0.0247701	0.0909096	-0.037768	-0.0101488	-0.0685596	1	-0.0377281	0.139895		-0.0107873	-0.232783	-0.475058	0.0639227	0.245357	0.218159	0.00361153	1	0.12719	0.097171		-0.0786265	0.23355	0.0613651	-0.0393022	0.153775	0.0337234	-0.0239739	1	0.222399	0.696073
-0.100364	-0.115691	-0.151711	0.244919	-0.187512	0.331506	0.125033	-0.0377281	1	0.220884		-0.126632	0.0190266	-0.191807	0.0739295	0.0827929	0.41821	0.081939	0.12719	1	0.111075		0.0652883	0.0997481	0.022229	0.217278	0.0476004	-0.0368069	-0.187745	0.222399	1	0.317897
-0.573721	0.146073	-0.459352	-0.133179	-0.228706	0.340925	0.0227294	0.139895	0.220884	1		0.0646827	0.183768	-0.046071	0.122639	0.208666	-0.336108	0.144598	0.097171	0.111075	1		0.0113342	0.402756	0.184985	0.181074	-0.0632142	0.0830537	0.0150973	0.696073	0.317897	1
